# Supplementary material for: Label-free enrichment of rare unconventional circulating neoplastic cells using a microfluidic dielectrophoretic sorting device
Source: PubMed Central journal article supplement (PMC8463600; doi:10.1038/s42003-021-02651-8), 2021-09-24
Supplement: 42003_2021_2651_MOESM2_ESM.pdf [file 42003_2021_2651_MOESM2_ESM.pdf]

## Description of Additional Supplementary Files

**File name:** Supplementary Movie 1.

**Description:** Peripheral blood mononuclear cells (PBMCs) sorting at 13 MHz with constant voltage of 9 Vpp.
